# Supplementary material
Source: PubMed Central journal article supplement (PMC2638888)

## Supplemental data 1

Angélique Besson-Bard, Sophie Griveau, Fethi Bedioui, and David Wendehenne

Real-time electrochemical detection of extracellular nitric oxide in tobacco cells exposed to cryptogein, an elicitor of defence responses

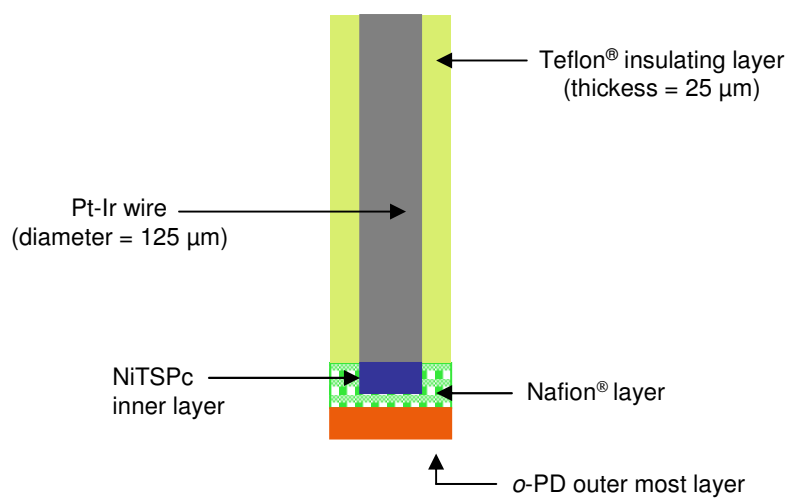

## Supplemental data 2

Angélique Besson-Bard, Sophie Griveau, Fethi Bedioui, and David Wendehenne

Real-time electrochemical detection of extracellular nitric oxide in tobacco cells exposed to cryptogein, an elicitor of defence responses

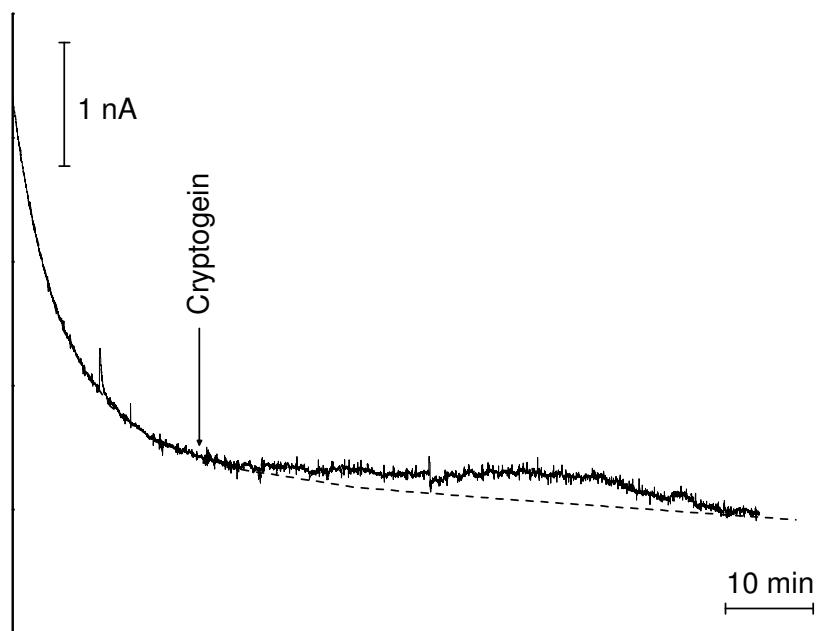

Supplement: ern189_1.pdf [file ern189_1.pdf]
